# Supplementary material for: Spatiotemporal Expression and Substrate Specificity Analysis of the Cucumber SWEET Gene Family
Source: PubMed Central journal article supplement (PMC5664084; doi:10.3389/fpls.2017.01855), 2017-10-27
Supplement: Image_1.pdf [file Image_1.pdf]

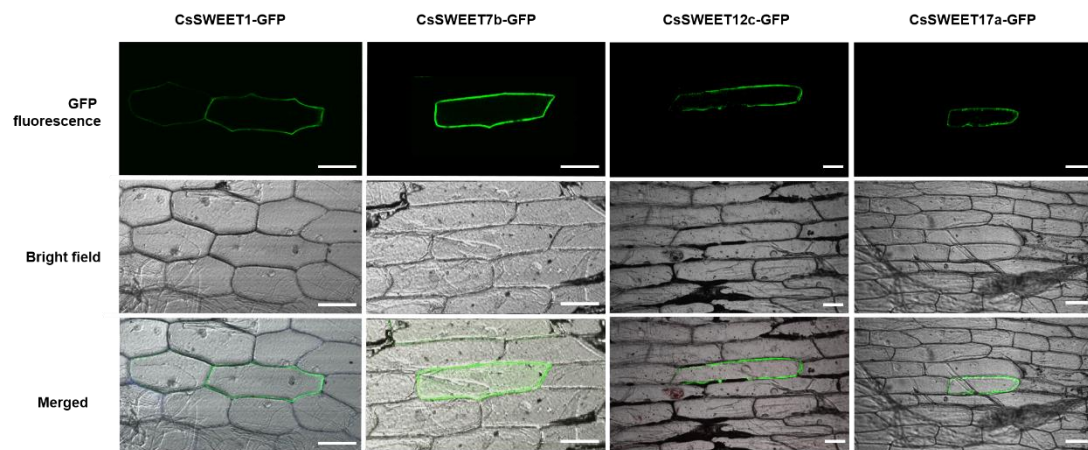

**Fig. S1.** The subcellular location of CsSWEET-green fluorescent protein (GFP) fusions in onion epidermal cells. Scale bars=50 $\mu$ m.
